# Supplementary material
Source: PubMed Central journal article supplement (PMC1317635)

Supplemental Figure 1

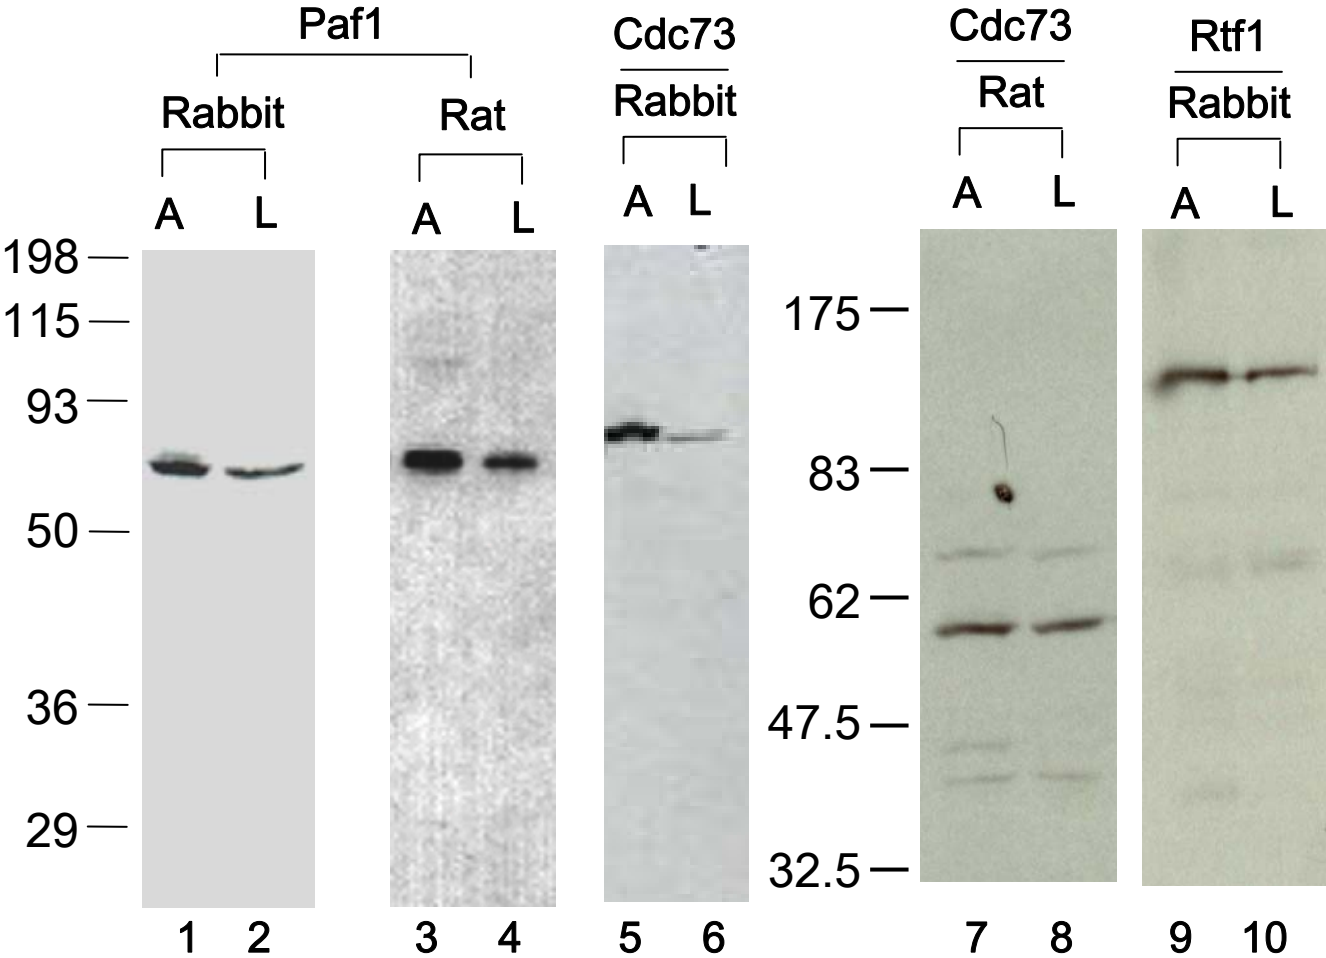



# Supplemental Figure 2

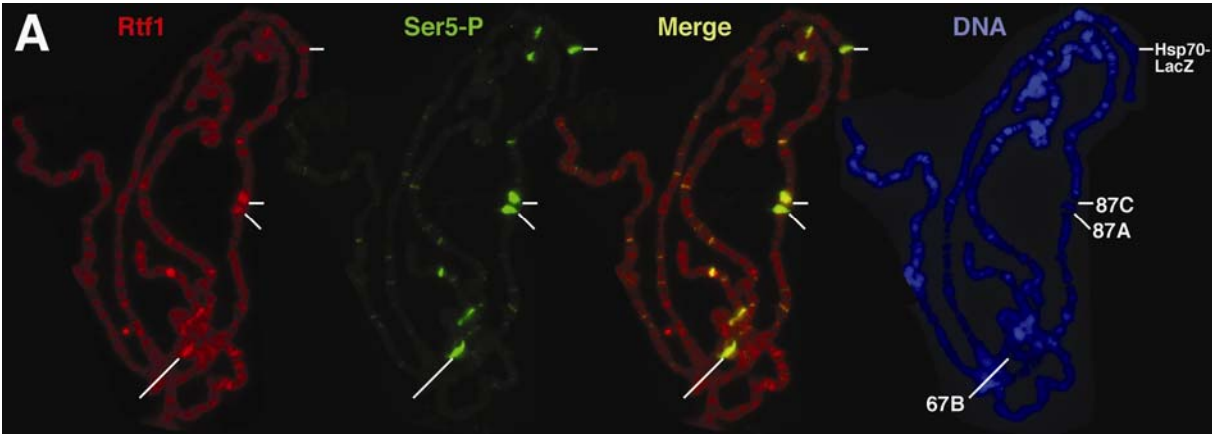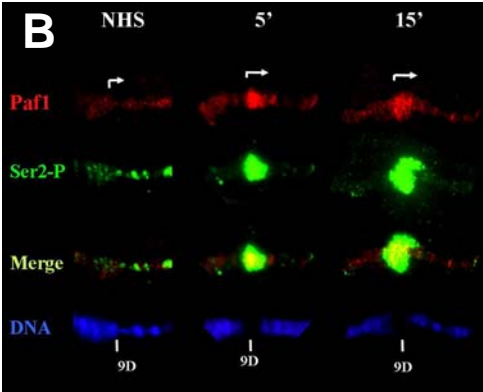

# Supplemental Figure 3

**A**

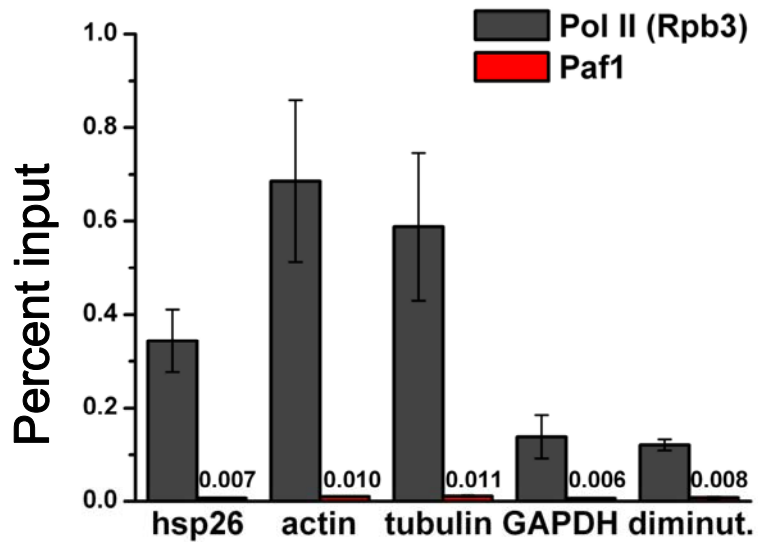

**B**

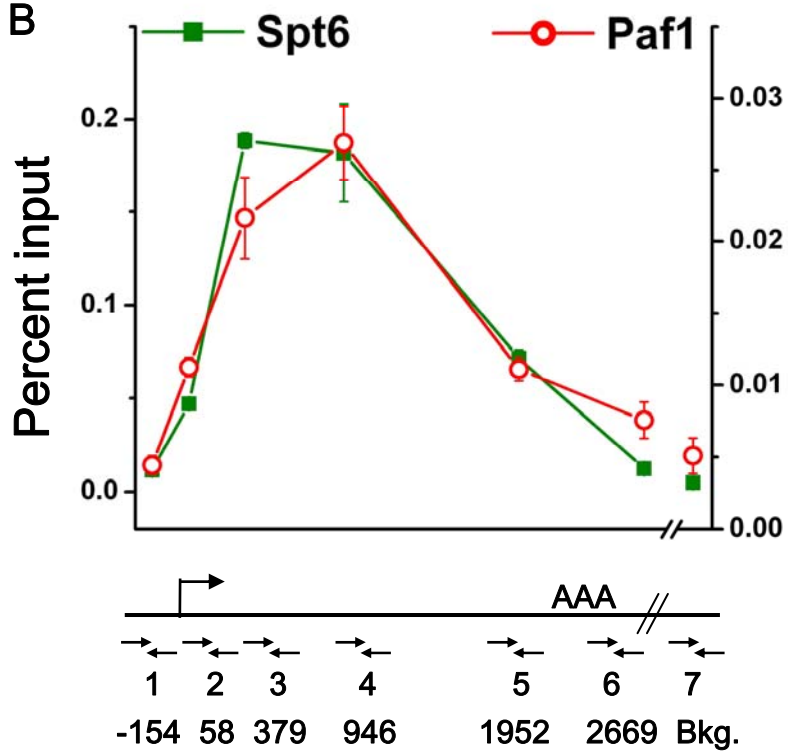

## Supplemental Figure 4

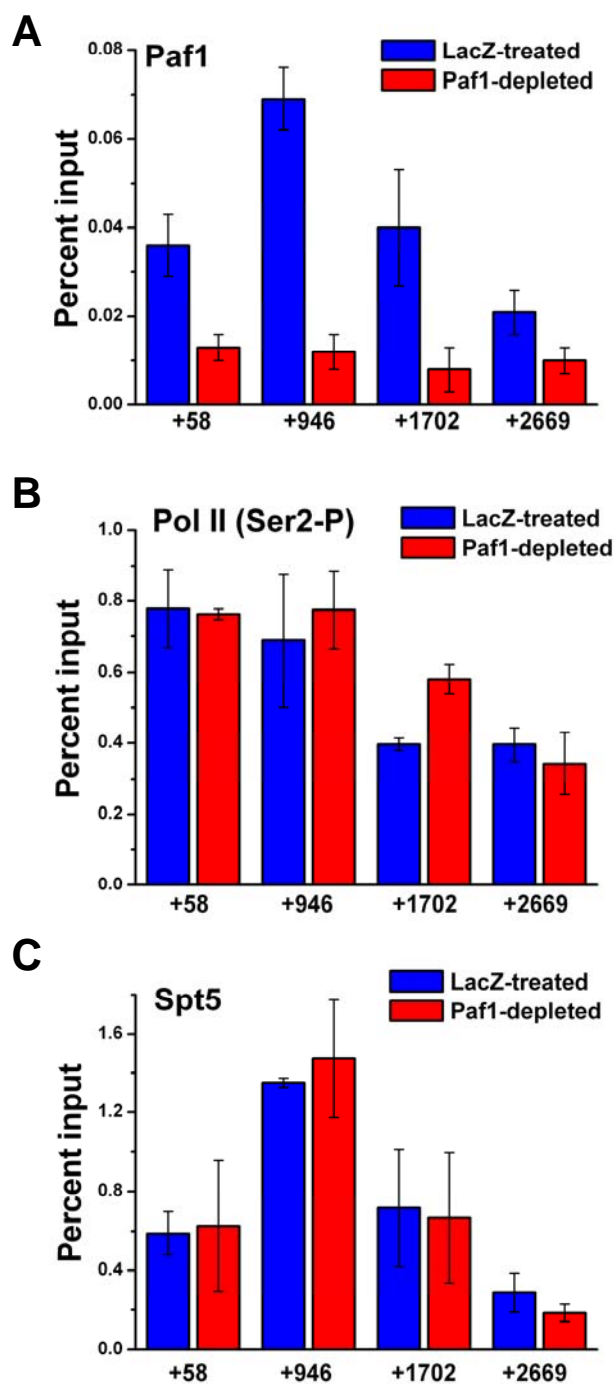

# Supplemental Figure 5

**A**

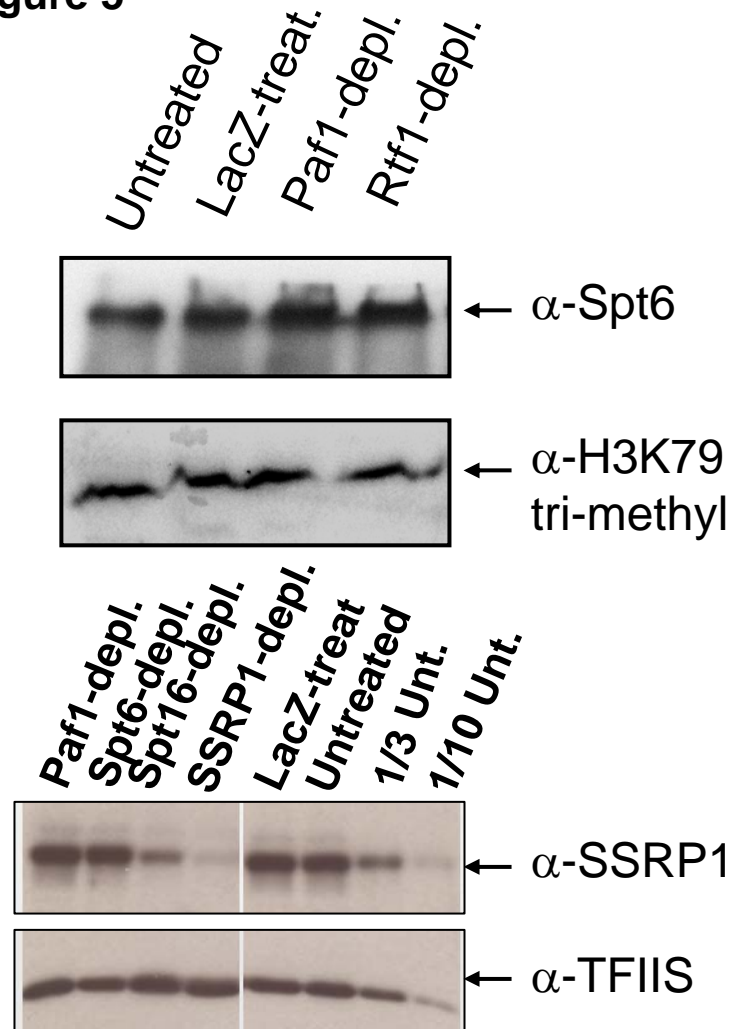

**B**

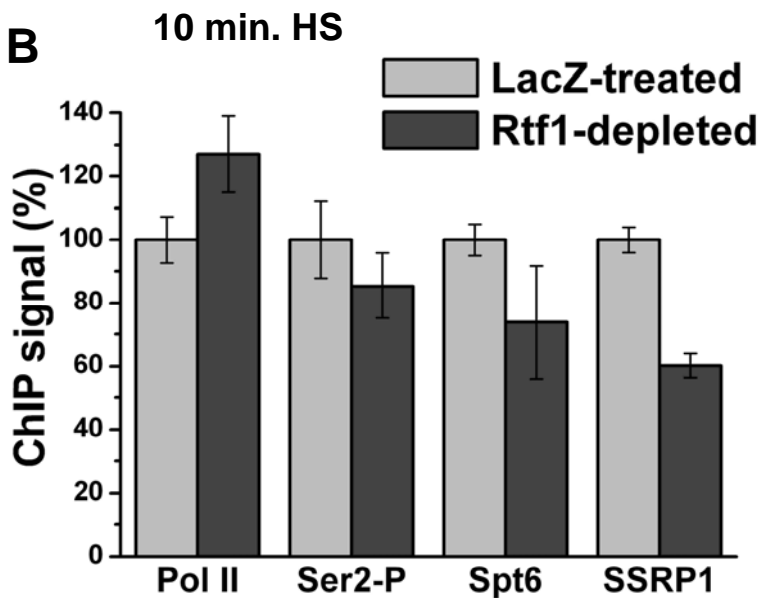

Supplement: molcellb_26_1_250__1.pdf [file molcellb_26_1_250__1.pdf]
